# Supplementary material for: Heparin sensing based on multisite-binding induced highly ordered perylene nanoaggregates
Source: Royal Society of Chemistry journal article supplement (doi:10.1039/d0cc05943a), 2020-01-01
Supplement: d0cc05943a1.pdf [file d0cc05943a1.pdf]

## Supporting Information

# Heparin Sensing Based on Multisite-Binding Induced Highly Ordered Perylene Nanoaggregates

Gyan H. Aryal,<sup>a</sup> Ganesh R. Rana,<sup>a</sup> Fei Guo,<sup>b</sup> Kenneth W. Hunter<sup>a</sup> and Liming Huang<sup>a\*</sup>

<sup>a</sup>*Department of Microbiology and Immunology, School of Medicine, University of Nevada, Reno, NV 89557, USA. E-mails: huang@med.unr.edu*

<sup>b</sup>*Department of Molecular and Cellular Biology, University of California, Davis, Davis, CA 95616–8665, USA*

### Table of Contents

1. Experimental Procedures (page 2 - 4)
  - Materials and Instruments
  - Binding Constant Determination
  - Cryo-EM Imaging
  - Synthesis
2. Supplementary Figures (page 4 - 8)
3. Detection of Limit (page 9)
4. Comparison of reported fluorescent sensors for heparin (Table S1) (page 10)
5. <sup>1</sup>H-NMR, <sup>13</sup>C-NMR and Mass Spectra (page 10 – 13)
6. References (page 13)

## 1. Experimental Procedures

### Materials and Instruments

Unless otherwise stated, all solvents and chemicals were purchased commercially (e.g. Sigma-Aldrich, TCI chemicals, and Alfa Aesar Chemicals) and used without further purification. Cucurbit[8]uril (CB[8]) was purchased from Strem Chemicals Inc. (Newburyport, MA) and dried at 110 °C for 24 hours before use. Heparin (heparin sodium porcine mucosa having molecular weights ranging from 6,000 to 30,000 Daltons, with most chains in the range of 17,000 to 19,000 Daltons) and human serum (from human male AB plasma, USA origin, sterile-filtered) were purchased from Sigma-Aldrich.

<sup>1</sup>H- and <sup>13</sup>C-NMR spectra were recorded on a Varian 400 MHz spectrometer in DMSO-d<sub>6</sub>, or D<sub>2</sub>O. Mass spectra were recorded on a Bruker Autoflex3 Matrix Assisted Laser Desorption Ionization-Time of Flight Mass Spectrometer (MALDI-TOF MS).

UV-vis spectra were recorded with a dual-beam Perkin Elmer Lambda 950 Spectrophotometer using UV-WIN Lab version 5.1.5 software. Fluorescence spectra were acquired using a Jobin-Yvon Horiba Fluorolog 3-222 Fluorescence Spectrophotometer. 1-cm quartz cuvettes or polystyrene (PS) plastic cuvettes were used for UV-vis and fluorescence studies. Quantum yields were determined using a previously reported water-soluble perylenemonoimide as a standard (QY=0.50 in methanol).<sup>1,2</sup>

The optical images of samples were acquired using a Canon D60 digital camera under room light. The fluorescence images were acquired using a Canon D60 digital camera in a dark room when samples were excited using a blue laser pointer (405 nm).

DLS analyses were performed using a Malvern Zetasizer Nano ZS (Malvern Instruments Ltd, Malvern, UK).

### Binding Constant Determination

The binding constants of CB[8]:**PDI1** complexes were determined by fluorescence titration and calculated with a 1:1 binding model using the Origin program and the equation  $(Int=I_{gh}+(I_g-I_{gh})\frac{((G_0-H_0-1/K_g)/2+\sqrt{((H_0+G_0+1/K_g)^2/4-H_0*G_0)})}{G_0})$ , where  $I_g$  is the fluorescence intensity of guest,  $I_{gh}$  is the intensity of host-guest complexes,  $G_0$  is the concentration of the guest, and  $K_g$  is the binding constant.<sup>3</sup>

## Cryo-EM Imaging

3  $\mu\text{L}$  of each sample ( $2 \times 10^{-4}$  M, in water) was applied onto a glow-discharged holey carbon grid (Quantifoil, 1.2/1.3 300 mesh) followed by a 60 sec incubation and blotting for 9 sec at 20  $^{\circ}\text{C}$  with 100% humidity and flash-freezing in liquid ethane using a FEI Vitrobot Mark III. Cryo-EM image acquisition was performed on a 200 kV ThermoFisher Glacios electron microscope equipped with a Gatan K3 detector at UC Davis BioEM Core Facility. Micrographs were recorded at a nominal magnification of  $\times 45,000$ , resulting in a pixel size of  $0.88 \text{ \AA}^2$  using SerialEM.<sup>4</sup> The dose rate was  $20 \text{ e } \text{\AA}^2 / \text{sec}$  with accumulated dose of 60 e in the 3 sec exposure.

## Synthesis

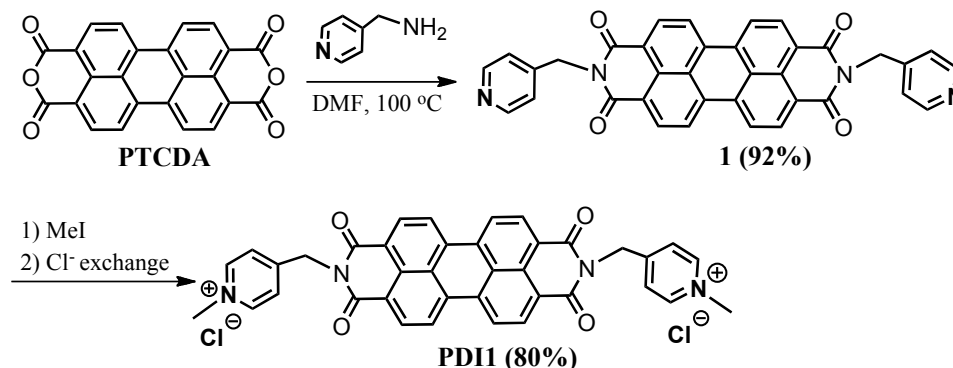

**Scheme S1:** Synthesis of **PDI1**.

**Synthesis of 1:** A mixture of 3, 4, 9, 10-perylenetetracarboxylic dianhydride (PTCDA) (0.20 g, 0.51 mmol) and 4-(Aminomethyl) Pyridine (0.21 g, 2.04 mmol) were added into 6 mL of DMF in a round-bottom flask. The mixture was stirred at 100  $^{\circ}\text{C}$  for 12 hours under nitrogen. The reaction mixture was cooled down to room temperature and precipitate out using excess acetone. The resulting precipitate was collected by centrifugation at 6000 RPM and washed with excess acetone. The solid was dried under vacuum to yield **1** (0.27 g, 92%). <sup>1</sup>H NMR (Varian 400 MHz, CF<sub>3</sub>COOD)  $\delta$  9.0 (d,  $J = 8$  Hz, 4H), 8.95 (d,  $J = 8$  Hz, 4H), 8.84 (d,  $J = 8$  Hz, 4H), 8.31 (d,  $J = 8$  Hz, 4H), 5.92 (s, 4H); <sup>13</sup>H NMR (Varian 100 MHz, CF<sub>3</sub>COOD)  $\delta = 166.3, 141.0, 136.3, 133.2, 129.4, 126.7, 124.3, 121.4$  ppm; MALDI-TOF:  $m/z = 575.07$  [ $M+3H$ ]<sup>+</sup> (calc'd. 575.15 for C<sub>36</sub>H<sub>20</sub>N<sub>4</sub>O<sub>4</sub>).

**Synthesis of PD11:** Compound **1** (0.1 g, 0.175 mmol) and methyl iodide (0.5 g, 3.52 mmol) were added in toluene (5 mL) in a round bottom flask. The resulting mixture was stirred at 100 °C for 12 hours under nitrogen. The reaction mixture was cooled down to room temperature and precipitate out using excess acetone. The resulting precipitate was collected by centrifugation at 6000 RPM and washed with acetone. The solid was dried under vacuum at 110 °C overnight. The dry solid was dissolved in 5 mL DMSO and aqueous HCl (1.5 mL, 4M) was added for anion exchange. The resulting mixture was stirred at 50 °C for 4 hours and it was cooled down to r. t. followed by precipitate with excess acetone. The precipitate was collected by centrifugation and washed with acetone. The solid was dried under vacuum to yield **PD11** (94 mg, 80%). <sup>1</sup>H NMR (Varian 400 MHz, DMSO-d<sub>6</sub>) δ 8.95 (d, *J* = 8 Hz, 4H), 8.88 (d, *J* = 8 Hz, 4H), 8.56 (d, *J* = 8 Hz, 4H), 8.16 (d, *J* = 8 Hz, 4H), 5.51 (br, 4H), 4.27 (s, 6H); <sup>13</sup>C NMR (Varian 100 MHz, CF<sub>3</sub>COOD) δ = 169.3, 161.6, 157.0, 145.0, 136.4, 139.3, 129.4, 127.5, 124.4, 121.5, 47.5, 43.1 ppm; MALDI-TOF: *m/z* = 604.25 [M+2H]<sup>+</sup> (calc'd. 604.20 for C<sub>38</sub>H<sub>24</sub>N<sub>6</sub>N<sub>4</sub>O<sub>4</sub>).

## 2. Supplementary Figures

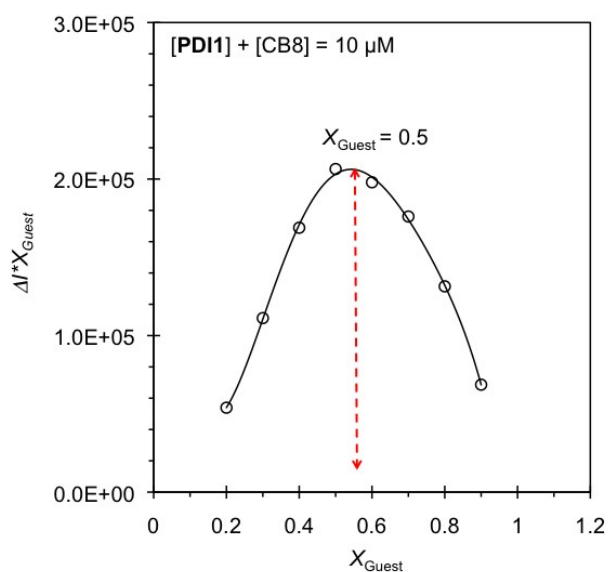

**Figure S1.** The Job plot for CB[8]:**PD11** (the total concentration of the guest **PD11** and the host CB8 was fixed at 10 μM).

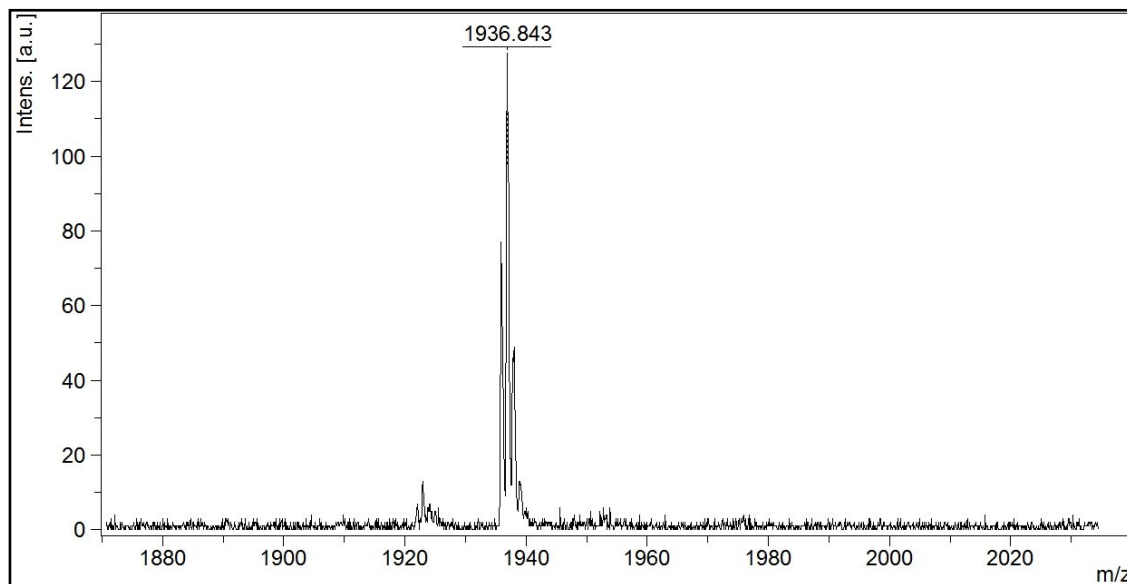

**Figure S2.** MALDI mass of CB[8]:**PDI1** using  $\alpha$ -Cyano-4-hydroxycinnamic acid as a matrix. [CB[8]:**PDI1** + 3H]: Observed mass 1936.84 Da, calculated mass 1936.29Da.

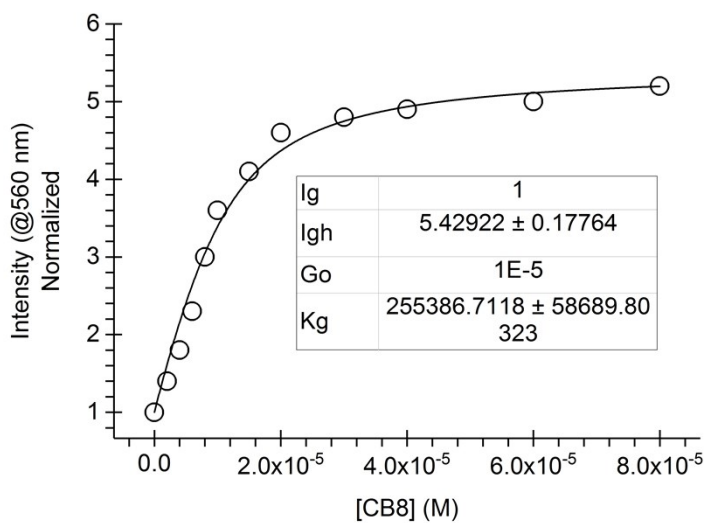

**Figure S3.** The binding curve for CB[8]:**PDI1** (The fluorescence titration experiment of **PDI1** (10  $\mu$ M) in ultrapure water in the presence of CB[8] and the fluorescence intensity was plotted against the concentration of CB[8]). The solid line represents the best fitting of the data according to a 1:1 binding.

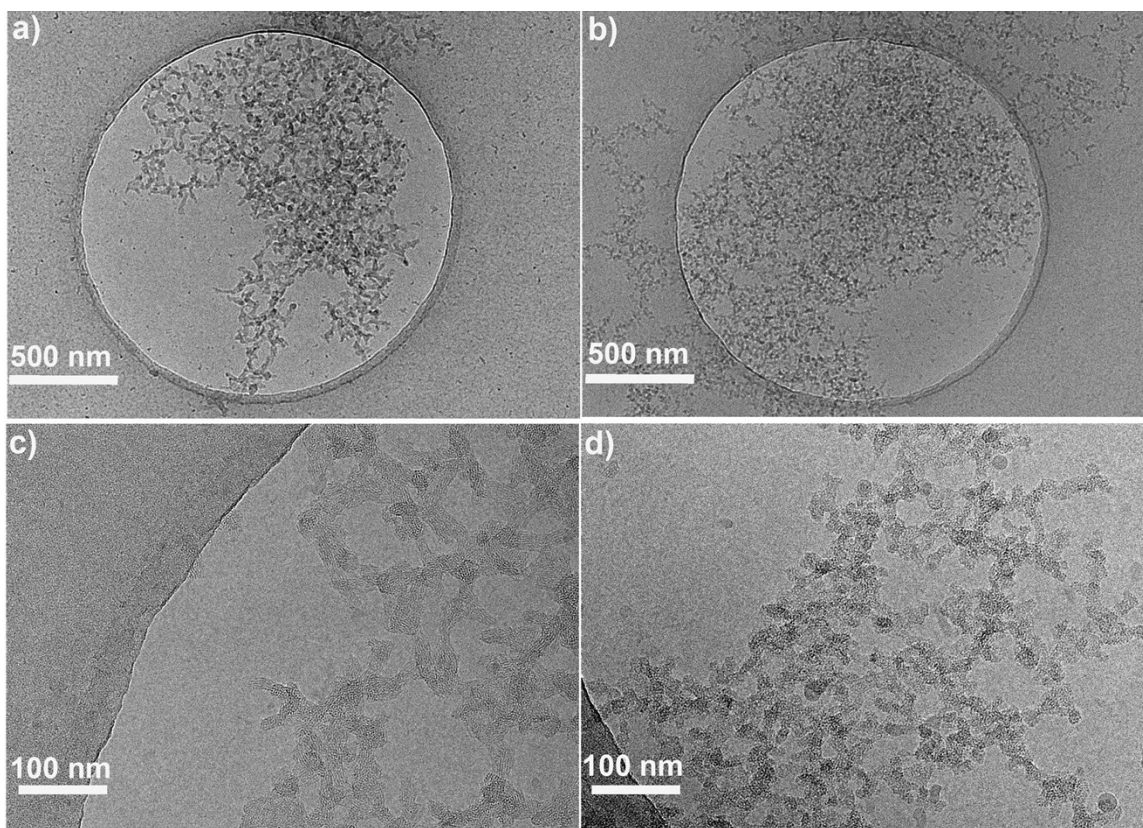

**Figure S4.** (a) and (c) Cryo-EM images of **PDII** ( $2 \times 10^{-4}$  M) with heparin in water. (b) and (d) Cryo-EM images of **CB[8]:PDII** (1:1,  $2 \times 10^{-4}$  M **PDII**) with heparin in water.

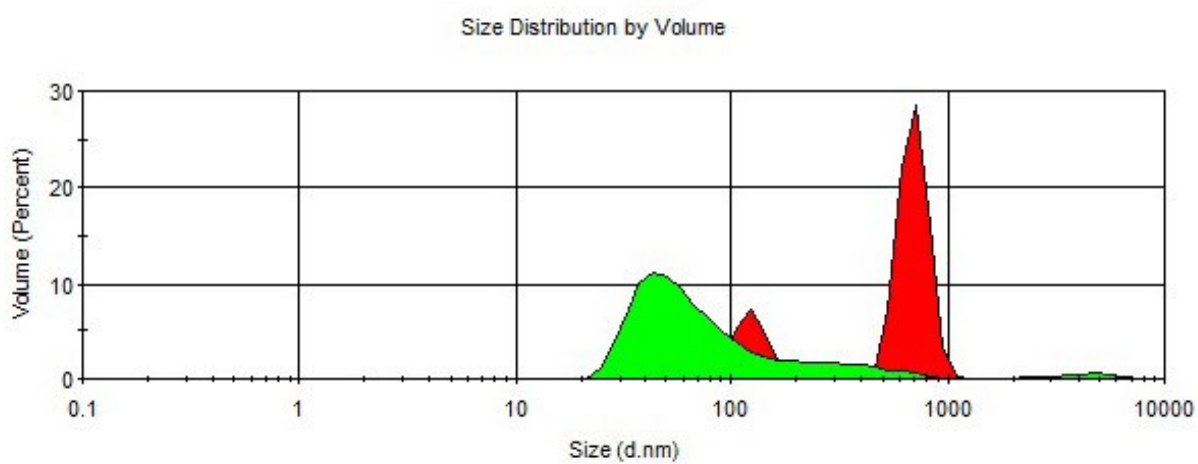

**Figure S5.** The size distribution by volume of **PDII** ( $2 \times 10^{-4}$  M) (red) and **HEP:PDII** (0.2 mg/mL HEP,  $2 \times 10^{-4}$  M **PDII**) (green) in ultra-pure water.

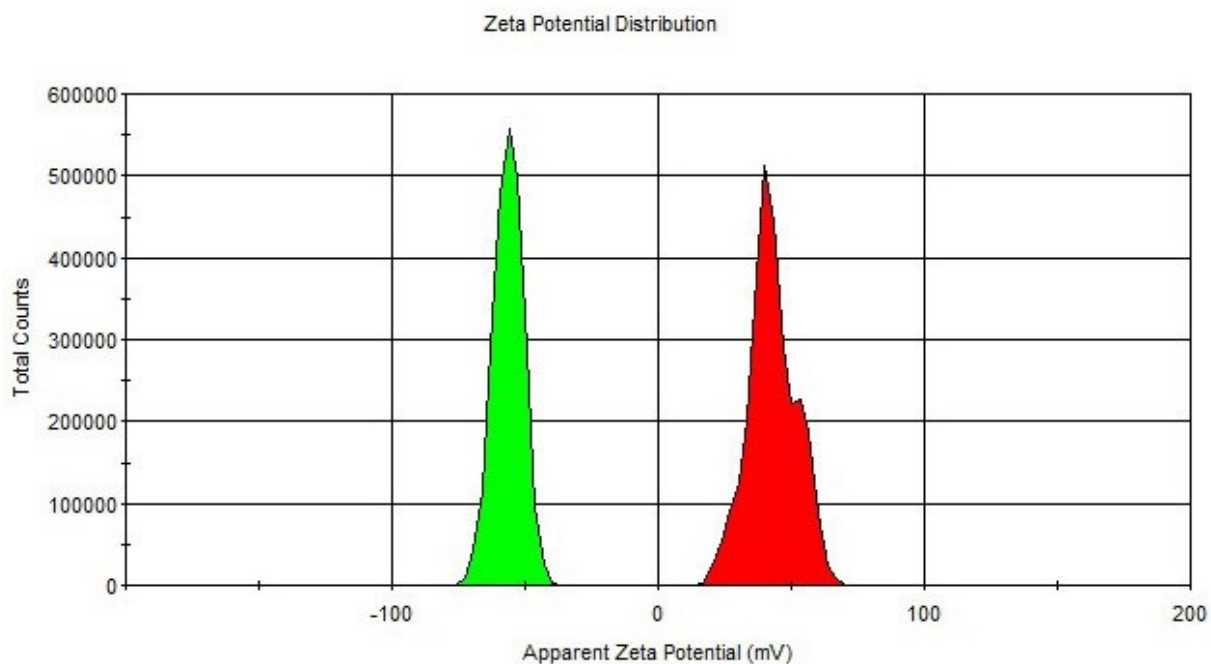

**Figure S6.** The zeta potential distribution of **PDI1** ( $2 \times 10^{-4}$  M) (red) and HEP:**PDI1** (0.2 mg/mL HEP,  $2 \times 10^{-4}$  M **PDI1**) (green) in ultra-pure water.

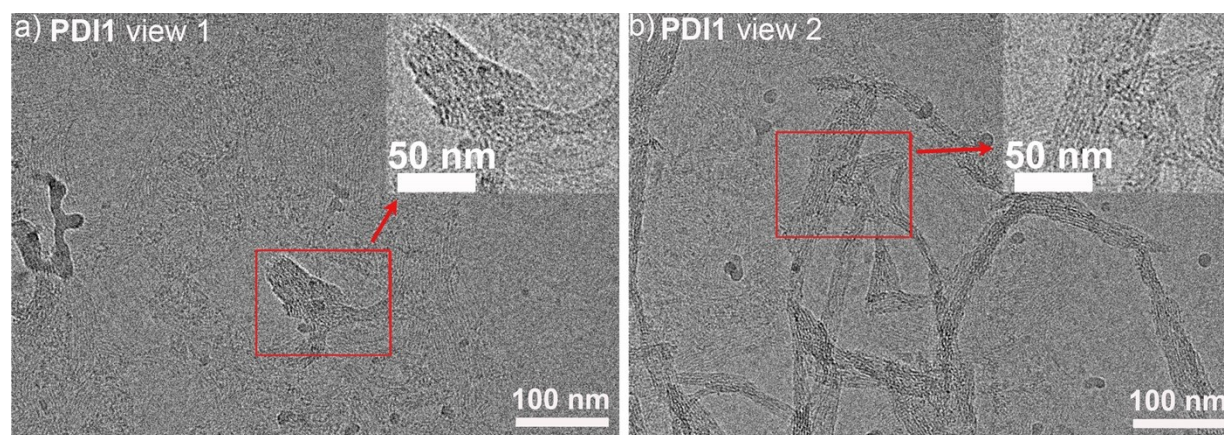

**Figure S7.** Low power views of cryo-EM images of aggregates of **PDI1** ( $2 \times 10^{-4}$  M) in water. Inset: the magnified cryo-EM images of **PDI1** aggregates.

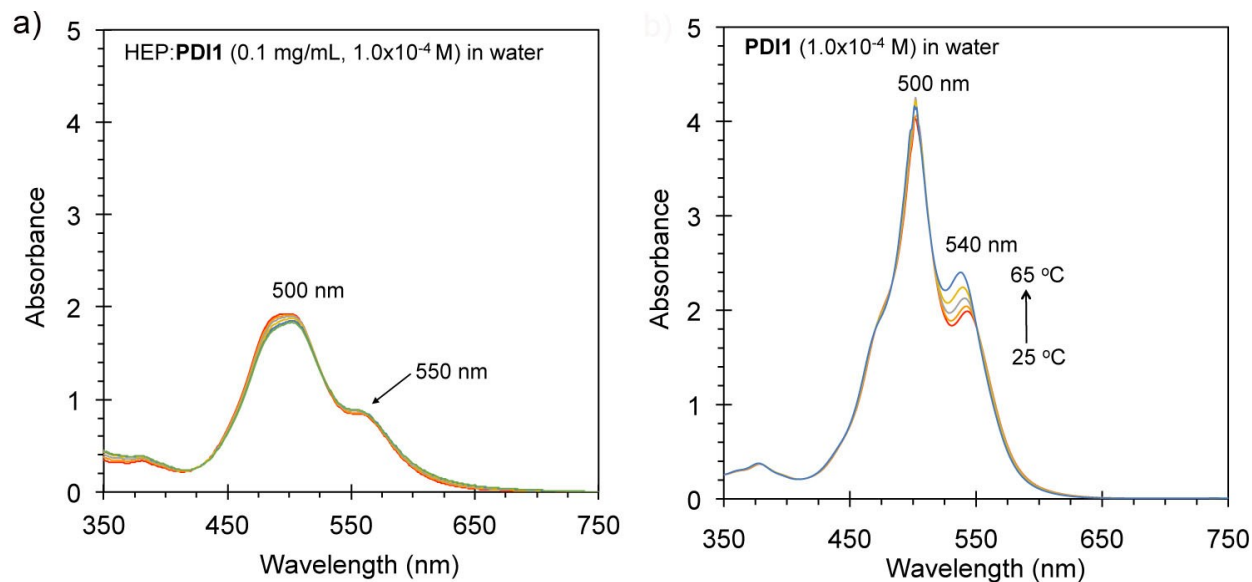

**Figure S8.** (a) The absorbance of HEP:**PDI1** (0.1 mg /mL HEP and  $1.0 \times 10^{-4}$  M **PDI1**) in water with temperatures from 25 °C to 65 °C. (b) The absorbance of HEP:**PDI1** ( $1.0 \times 10^{-4}$  M) in water with temperatures from 25 °C to 65 °C.

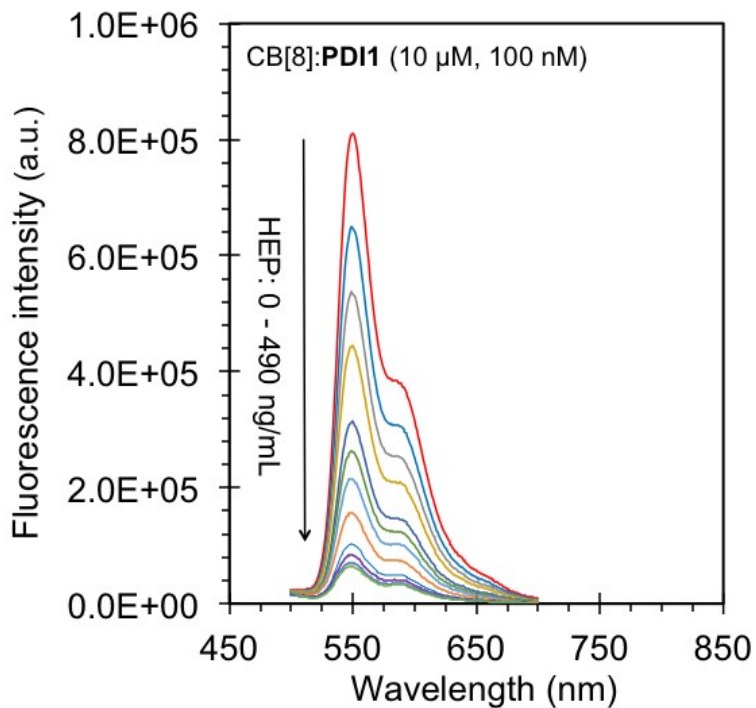

**Figure S9.** The fluorescence emission spectra of CB[8]:**PDI1** (10  $\mu$ M CB[8], 100 nM **PDI1**) in Tris buffer (pH 7.4) in the presence of HEP from 0 to 490 ng/mL.



### 3. Detection Limit

The limit of detection (LOD) was calculated from the fluorescence titration using following equation.<sup>5</sup>

$$\text{LOD} = 3 \sigma / K \approx 2.4 \text{ ng/mL}$$

Where  $\sigma$  is the standard deviation (the standard deviation of the fluorescence changes of the CB[8]:PDI1 (10  $\mu\text{M}$ , 100 nM) in Tris buffer (pH 7.4) in the presence of 9.8 ng/mL of HEP with three duplicates.  $\sigma$  was calculated to be 0.011) and K (equals to 0.0138) is the slope between the fluorescence intensity of CB[8]:PDI1 versus HEP concentration.

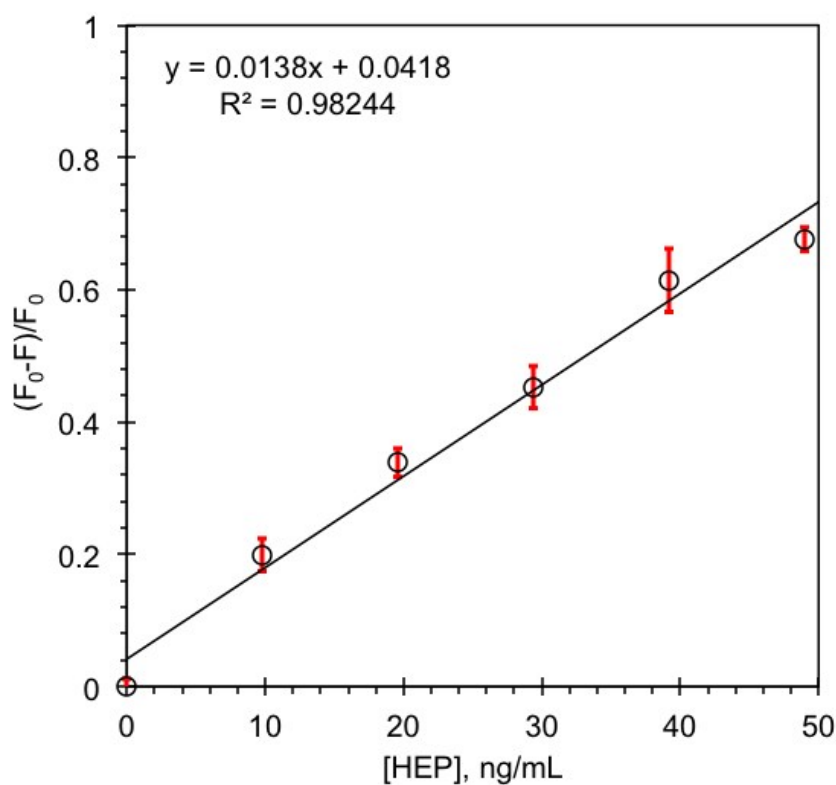

**Figure S10.** A linear plot of  $(F_0 - F)/F_0$  vs. HEP in the concentration range of 0 to 49 ng/mL. Where  $F_0$  and  $F$  are the fluorescence intensity of CB[8]:PDI1 in Tris buffer (pH 7.4).

#### 4. Comparison of Fluorescent Sensors for Heparin

| Probes                                 | Response type | LOD in buffer                       | Application       | Ref.      |
|----------------------------------------|---------------|-------------------------------------|-------------------|-----------|
| Pseudoisocyanine                       | Turn on       | 2 nM                                | 3% serum          | 8a        |
| Salicyladehyde azine derivatives       | Turn on       | 8.64 mU/mL                          | 1% horse serum    | 8b        |
| Tetraphenylethene derivatives          | Turn on       | 1.53 ng/mL                          | 1% serum          | 8c        |
| Pyrene derivative/GO                   | Turn-on       | 0.046 U/mL                          | Not measured      | 8d        |
| Polyadenosine-coralayne complex        | Turn-off      | 4 nM                                | 2.5% plasma       | 8e        |
| CuInS2 quantum dots                    | Turn-off      | 12.36 nM                            | Not measured      | 8f        |
| Rhodamine B-labelled peptides          | Turn-off      | 7.5 pM                              | 216-fold dilution | 8g        |
| Perylene derivative/host-guest complex | Turn off      | 2.4 ng/mL (or 0.13 nM or 0.5 mU/mL) | 1% serum          | This work |

Table S1. Comparison of reported fluorescent sensors for heparin.

#### 5. <sup>1</sup>H-NMR, <sup>13</sup>C-NMR and Mass Spectra

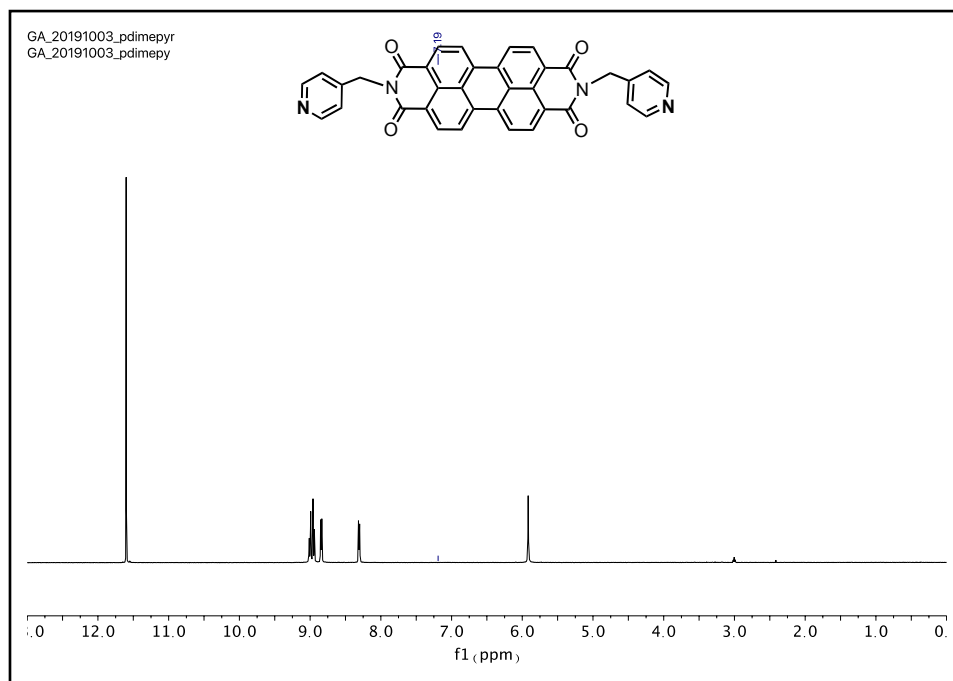

Figure S11. <sup>1</sup>H-NMR of **1** in CF<sub>3</sub>COOD.

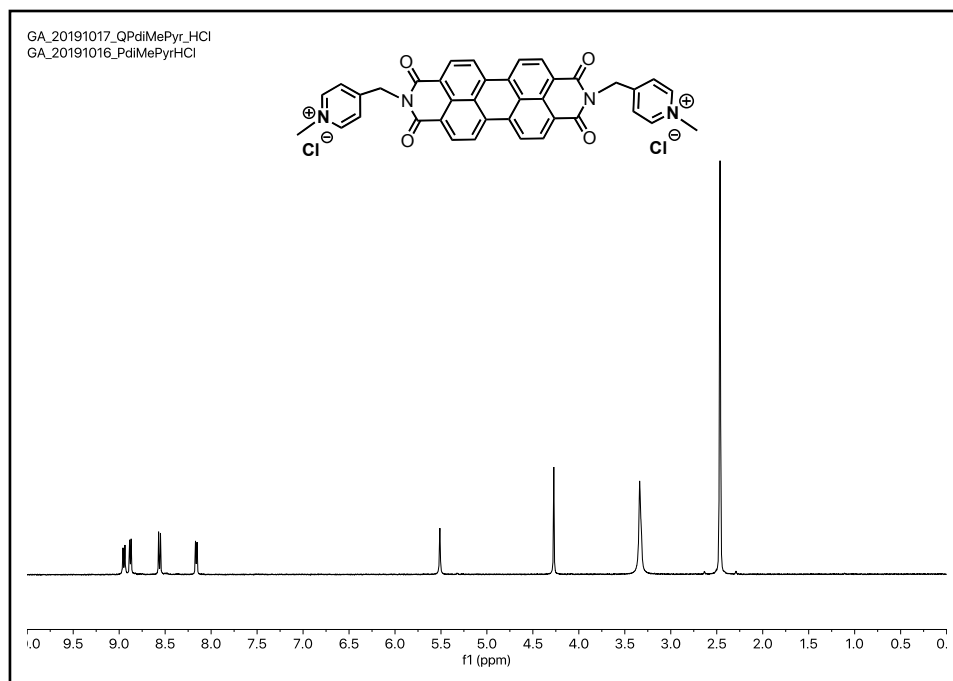

**Figure S12.**  $^1\text{H-NMR}$  of **PD11** in  $\text{DMSO-d}_6$

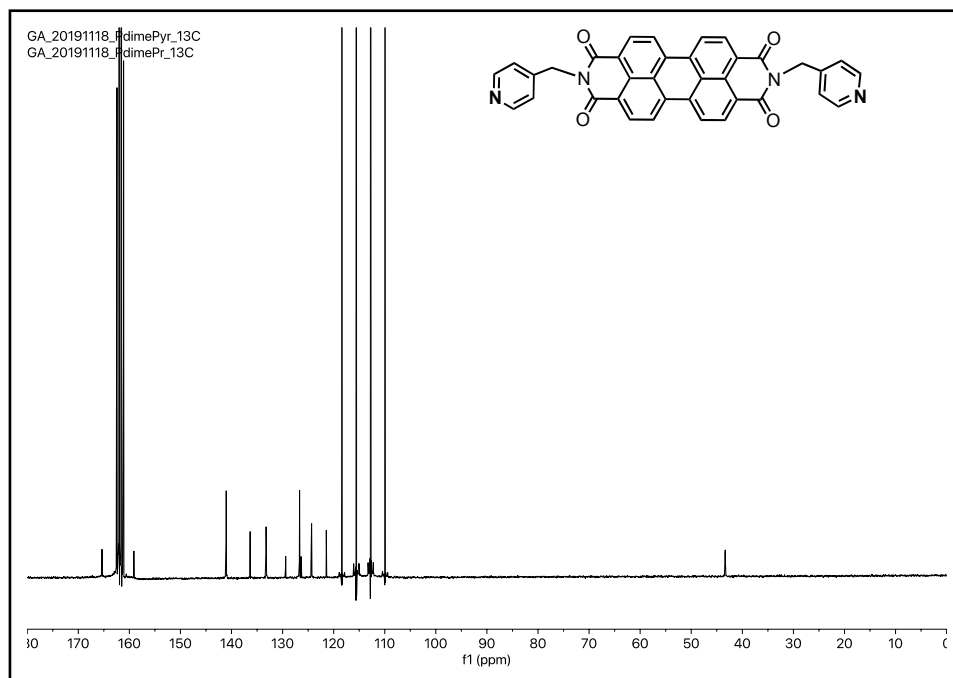

**Figure S13.**  $^{13}\text{C-NMR}$  of **1** in  $\text{CF}_3\text{COOD}$ .

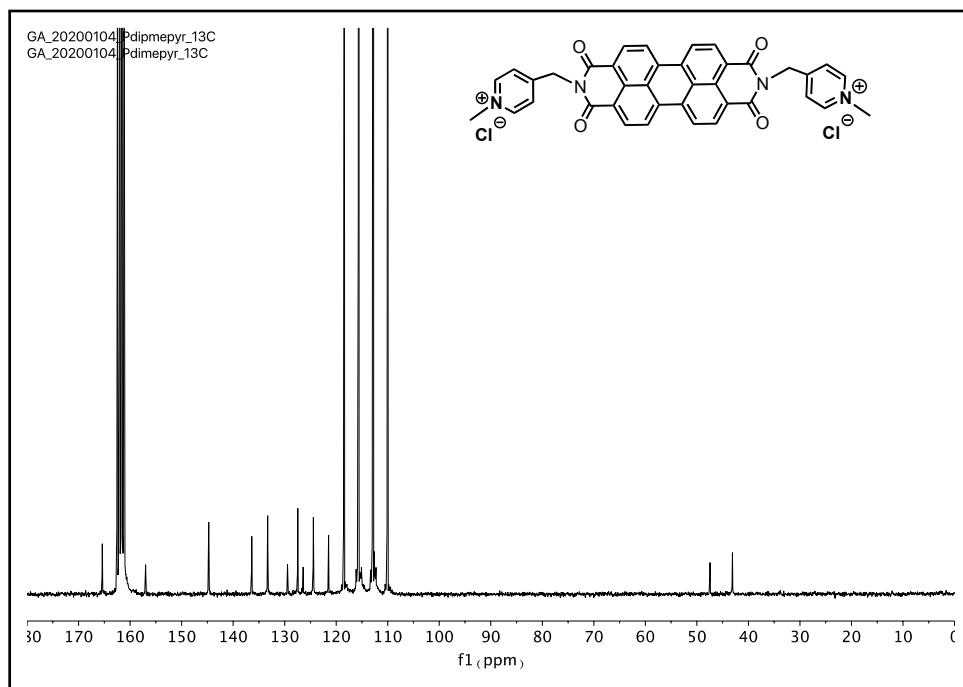

**Figure S14.**  $^{13}\text{C}$ -NMR of PD11 in  $\text{CF}_3\text{COOD}$ .

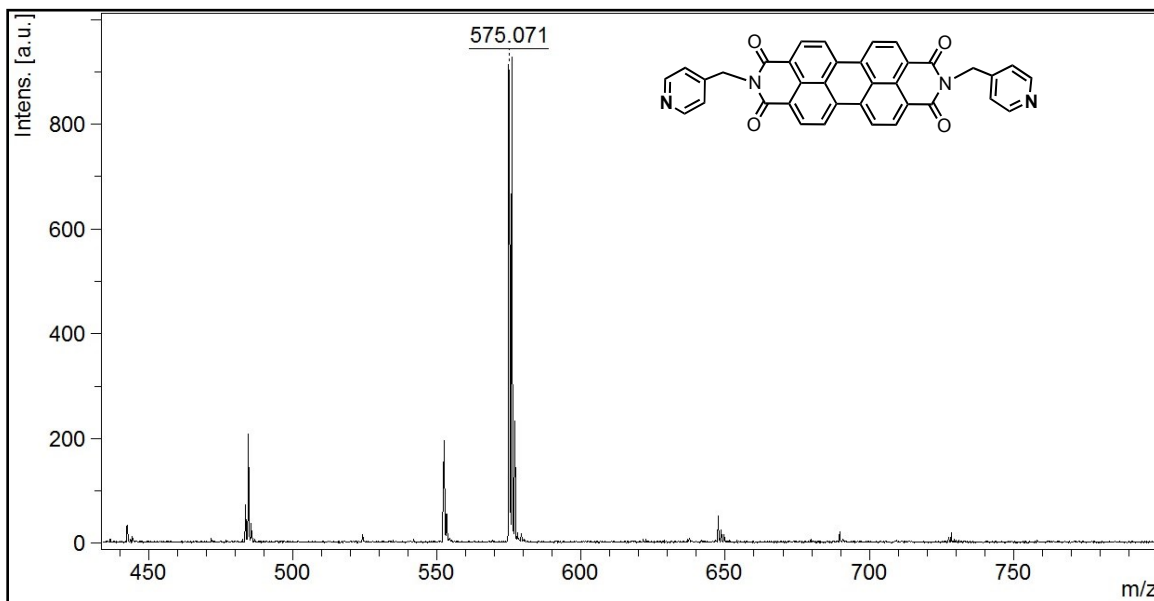

**Figure S15.** MALDI mass of **1** using 2-5-dihydroxy benzoic acid as a matrix.  $[\mathbf{1}+3\text{H}]^+$ : Observed mass 575.07 Da, calculated mass 575.15Da.

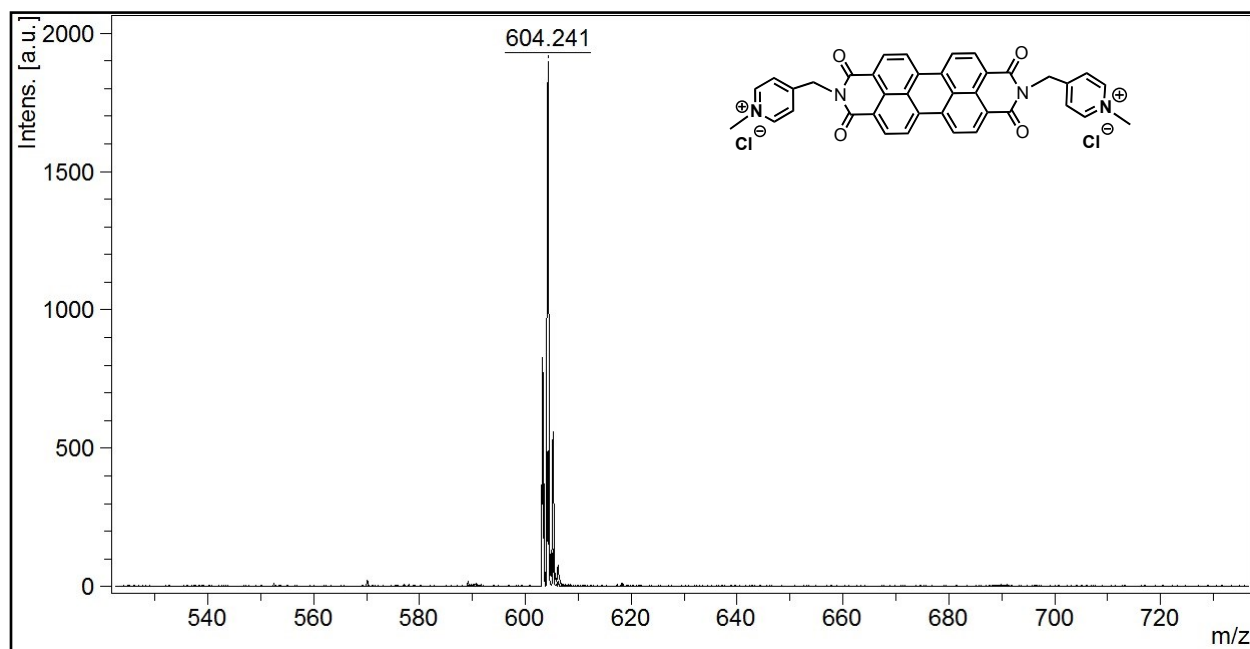

**Figure S16.** MALDI mass of **PDI1** using  $\alpha$ -Cyano-4-hydroxycinnamic acid as a matrix. [**PDI1**+2H]<sup>+</sup>:  
Observed mass 604.24 Da, calculated mass 604.20Da.

## 6. References

1. L. Huang, S.-W. Tam-Chang, W. Seo and K. Rove, *Adv. Mater.*, 2007, **19**, 4149-4152.
2. L. Huang and S.-W. Tam-Chang, *J. Fluoresc.*, 2011, **21**, 213-222.
3. W. M. Nau and X. Zhang, *J. Am. Chem. Soc.*, 1999, **121**, 8022–8032.
4. D. N. Mastrorade, *J. Struct. Biol.*, 2005, **152**, 36-51.
